# Supplementary material for: Exosomal Release of L-Plastin by Breast Cancer Cells Facilitates Metastatic Bone Osteolysis
Source: PubMed Central journal article supplement — Transl Oncol. 2018 Dec 21;12(3):462–74. doi: 10.1016/j.tranon.2018.11.014 (PMC6305809; doi:10.1016/j.tranon.2018.11.014), 2018-12-21
Supplement: mmc2.pdf [file mmc2.pdf]

## Supplemental Figure 2.

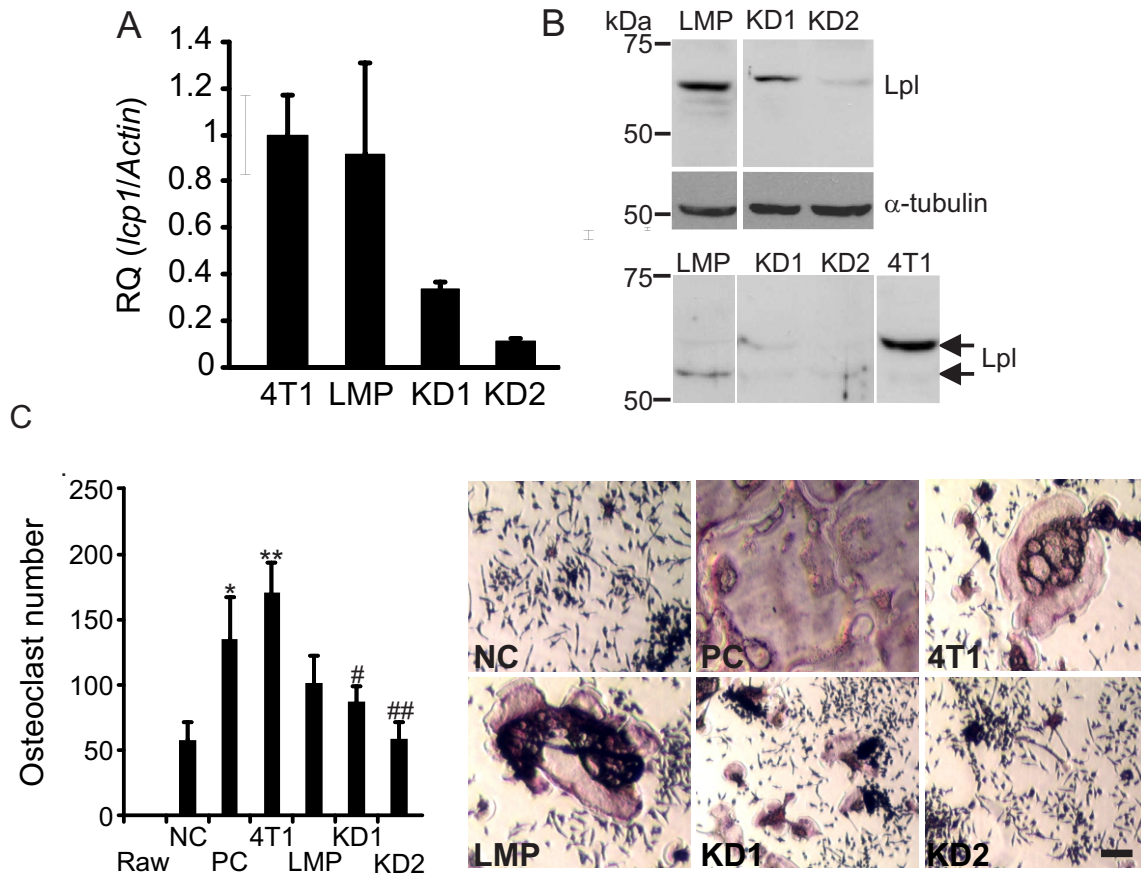

**Supplemental Figure 2. Generation of L-plastin targeting shRNA 4T1 clones.** 4T1 cells were transfected with shRNA targeting L-plastin with two independent shRNA expression vectors (KD1 and KD2), or an empty vector (LMP), and stable clones were generated. **A)** Expression of *Lcp1* in parental 4T1 cells and shRNA cells harboring control vector (LMP), or shRNA for L-plastin (KD1 and KD2) was assessed and normalized to beta-actin (TaqMan: *Lcp1*: Mn00786153\_s1, *Actb*: Mn00607938\_s1).

**B)** Expression of L-plastin in cell lysates (top) and conditioned medium (bottom) was assessed by immunoblotting. **C)** RAW 264.7 cells were cultured untreated (RAW), or primed with RANKL (50 ng/mL) for 2 days and then cultured for additional two days without treatment (negative control, NC), with RANKL (50 ng/mL, PC) or with 10% CM with from parental 4T1 cells (4T1), shRNA control clone LMP, or shLCP1 clones KD1 and KD2. Average numbers (left) and representative images (right), of osteoclasts formed in indicated conditions. Scale bar of 50  $\mu$ m applies to all images. Data are means  $\pm$  SEM, N = 6; \*p < 0.05, \*\*p < 0.01 compared to negative control, #p < 0.05, ##p < 0.01 compared to 4T1, assessed by Student's t-test.
