# Supplementary material for: Exosomal Release of L-Plastin by Breast Cancer Cells Facilitates Metastatic Bone Osteolysis
Source: PubMed Central journal article supplement — Transl Oncol. 2018 Dec 21;12(3):462–74. doi: 10.1016/j.tranon.2018.11.014 (PMC6305809; doi:10.1016/j.tranon.2018.11.014), 2018-12-21
Supplement: mmc3.pdf [file mmc3.pdf]

### Supplemental Figure 3.

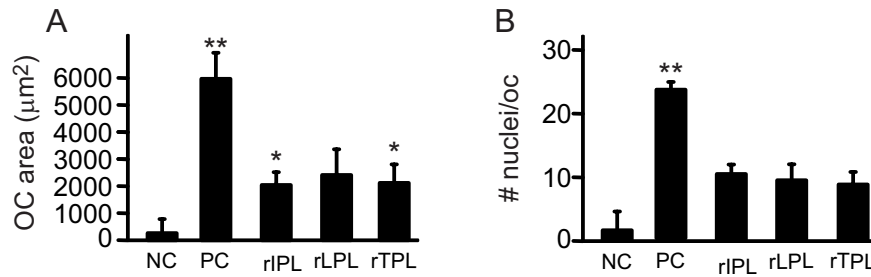

**Supplemental Figure 3.** RAW 264.7 cells were primed with RANKL (50 ng/mL) for 2 days and then cultured for an additional two days without RANKL treatment (negative control, NC), with RANKL (50 ng/mL, positive control, PC), with human recombinant plastin-1 (rIPL), 2 (rLPL) and 3 (rTPL) at 10 μg/mL. A) Average osteoclast planar area. B) Average number of nuclei per osteoclast. Data are means ± SEM, N= 30-55 cells, \*p<0.05, \*\*p<0.01 compared to NC assessed by student's t-test.
