# Supplementary material for: Exosomal Release of L-Plastin by Breast Cancer Cells Facilitates Metastatic Bone Osteolysis
Source: PubMed Central journal article supplement — Transl Oncol. 2018 Dec 21;12(3):462–74. doi: 10.1016/j.tranon.2018.11.014 (PMC6305809; doi:10.1016/j.tranon.2018.11.014), 2018-12-21
Supplement: mmc4.pdf [file mmc4.pdf]

Tiedemann et al Supplemental Table 1.

**Table 1. Differential expression of *LCPI* and *PRDX4* in normal tissue and primary tumours for different cancer types.** *LCPI* and *PRDX4* mRNA expression data were obtained from the TCGA database and standardized mean differences (SMD) between normal tissue and primary tumour expression were estimated along with corresponding standard errors (SE) and 95% confidence intervals (loCI: lower limit, hiCI: upper limit). Additionally, random effects estimate of overall pooled standardized mean difference (SMD) across all cancer types was determined.  $N_{norm}$ : normal tissue sample size,  $N_{prim}$ : primary tumour site sample size. *Red*: significant upregulation, *blue*: significant downregulation, *grey*: non-significant difference.

| Cancer         | <i>LCPI</i>  |             |              |             | <i>PRDX4</i> |             |             |             | $N_{norm}$ | $N_{prim}$  |
|----------------|--------------|-------------|--------------|-------------|--------------|-------------|-------------|-------------|------------|-------------|
|                | SMD          | se          | loCI         | hiCI        | SMD          | se          | loCI        | hiCI        |            |             |
| <b>BCLA</b>    | 0.08         | 0.23        | -0.38        | 0.54        | 1.13         | 0.24        | 0.66        | 1.59        | 19         | 408         |
| <b>BRCA</b>    | 0.20         | 0.10        | 0.01         | 0.40        | 0.93         | 0.10        | 0.73        | 1.13        | 113        | 1095        |
| <b>CECSC</b>   | 0.69         | 0.58        | -0.45        | 1.83        | 0.07         | 0.58        | -1.07       | 1.20        | 3          | 304         |
| <b>CHOL</b>    | 0.02         | 0.37        | -0.71        | 0.75        | -2.08        | 0.43        | -2.93       | -1.24       | 9          | 36          |
| <b>COAD</b>    | -1.02        | 0.17        | -1.35        | -0.68       | 1.90         | 0.18        | 1.55        | 2.26        | 41         | 285         |
| <b>ESCA</b>    | 0.55         | 0.31        | -0.06        | 1.16        | 0.18         | 0.31        | -0.43       | 0.78        | 11         | 184         |
| <b>GBM</b>     | 1.93         | 0.47        | 1.02         | 2.85        | 3.69         | 0.50        | 2.71        | 4.67        | 5          | 156         |
| <b>HNSC</b>    | 0.28         | 0.16        | -0.03        | 0.59        | 0.47         | 0.16        | 0.16        | 0.78        | 44         | 520         |
| <b>KICH</b>    | -0.46        | 0.24        | -0.93        | 0.00        | -0.43        | 0.24        | -0.89       | 0.03        | 25         | 66          |
| <b>KIRC</b>    | 1.77         | 0.13        | 1.51         | 2.03        | 2.39         | 0.14        | 2.11        | 2.67        | 72         | 534         |
| <b>KIRP</b>    | 0.67         | 0.19        | 0.30         | 1.04        | 1.05         | 0.19        | 0.68        | 1.42        | 32         | 291         |
| <b>LIHC</b>    | -0.53        | 0.15        | -0.83        | -0.23       | -0.78        | 0.15        | -1.07       | -0.48       | 50         | 371         |
| <b>LUAD</b>    | -1.24        | 0.14        | -1.52        | -0.97       | 1.73         | 0.14        | 1.44        | 2.01        | 59         | 515         |
| <b>LUSC</b>    | -1.48        | 0.15        | -1.79        | -1.18       | 1.56         | 0.15        | 1.26        | 1.86        | 51         | 502         |
| <b>PAAD</b>    | -1.58        | 0.51        | -2.59        | -0.58       | 0.88         | 0.51        | -0.12       | 1.88        | 4          | 178         |
| <b>PCPG</b>    | -0.46        | 0.58        | -1.60        | 0.68        | -0.25        | 0.58        | -1.39       | 0.90        | 3          | 182         |
| <b>PRAD</b>    | 0.46         | 0.14        | 0.18         | 0.75        | 1.06         | 0.15        | 0.77        | 1.35        | 52         | 497         |
| <b>READ</b>    | -0.97        | 0.34        | -1.63        | -0.30       | 1.42         | 0.35        | 0.74        | 2.10        | 10         | 94          |
| <b>SARC</b>    | 0.82         | 0.71        | -0.58        | 2.21        | 1.27         | 0.71        | -0.13       | 2.66        | 2          | 259         |
| <b>STAD</b>    | 0.41         | 0.18        | 0.07         | 0.76        | 0.56         | 0.18        | 0.21        | 0.90        | 35         | 415         |
| <b>THCA</b>    | 0.15         | 0.14        | -0.12        | 0.42        | 0.20         | 0.14        | -0.07       | 0.47        | 59         | 505         |
| <b>THYM</b>    | -0.65        | 0.71        | -2.05        | 0.75        | 0.78         | 0.71        | -0.62       | 2.18        | 2          | 120         |
| <b>UCEC</b>    | 0.20         | 0.22        | -0.23        | 0.62        | 0.94         | 0.22        | 0.50        | 1.38        | 24         | 176         |
| <b>Overall</b> | <b>-0.05</b> | <b>0.24</b> | <b>-0.53</b> | <b>0.43</b> | <b>0.82</b>  | <b>0.20</b> | <b>0.43</b> | <b>1.21</b> | <b>725</b> | <b>7693</b> |
